# Supplementary material
Source: PubMed Central journal article supplement (PMC3946996)

**Supplemental Figure Caption**

**Supplemental Figure.** Consolidated Standards of Reporting Trials (CONSORT) diagram of participant passage from enrollment through the 12-month visit of the Steroids for Corneal Ulcers trial. “Last observation carried forward” is indicated as “LOCF”.

ACCEPTED MANUSCRIPT

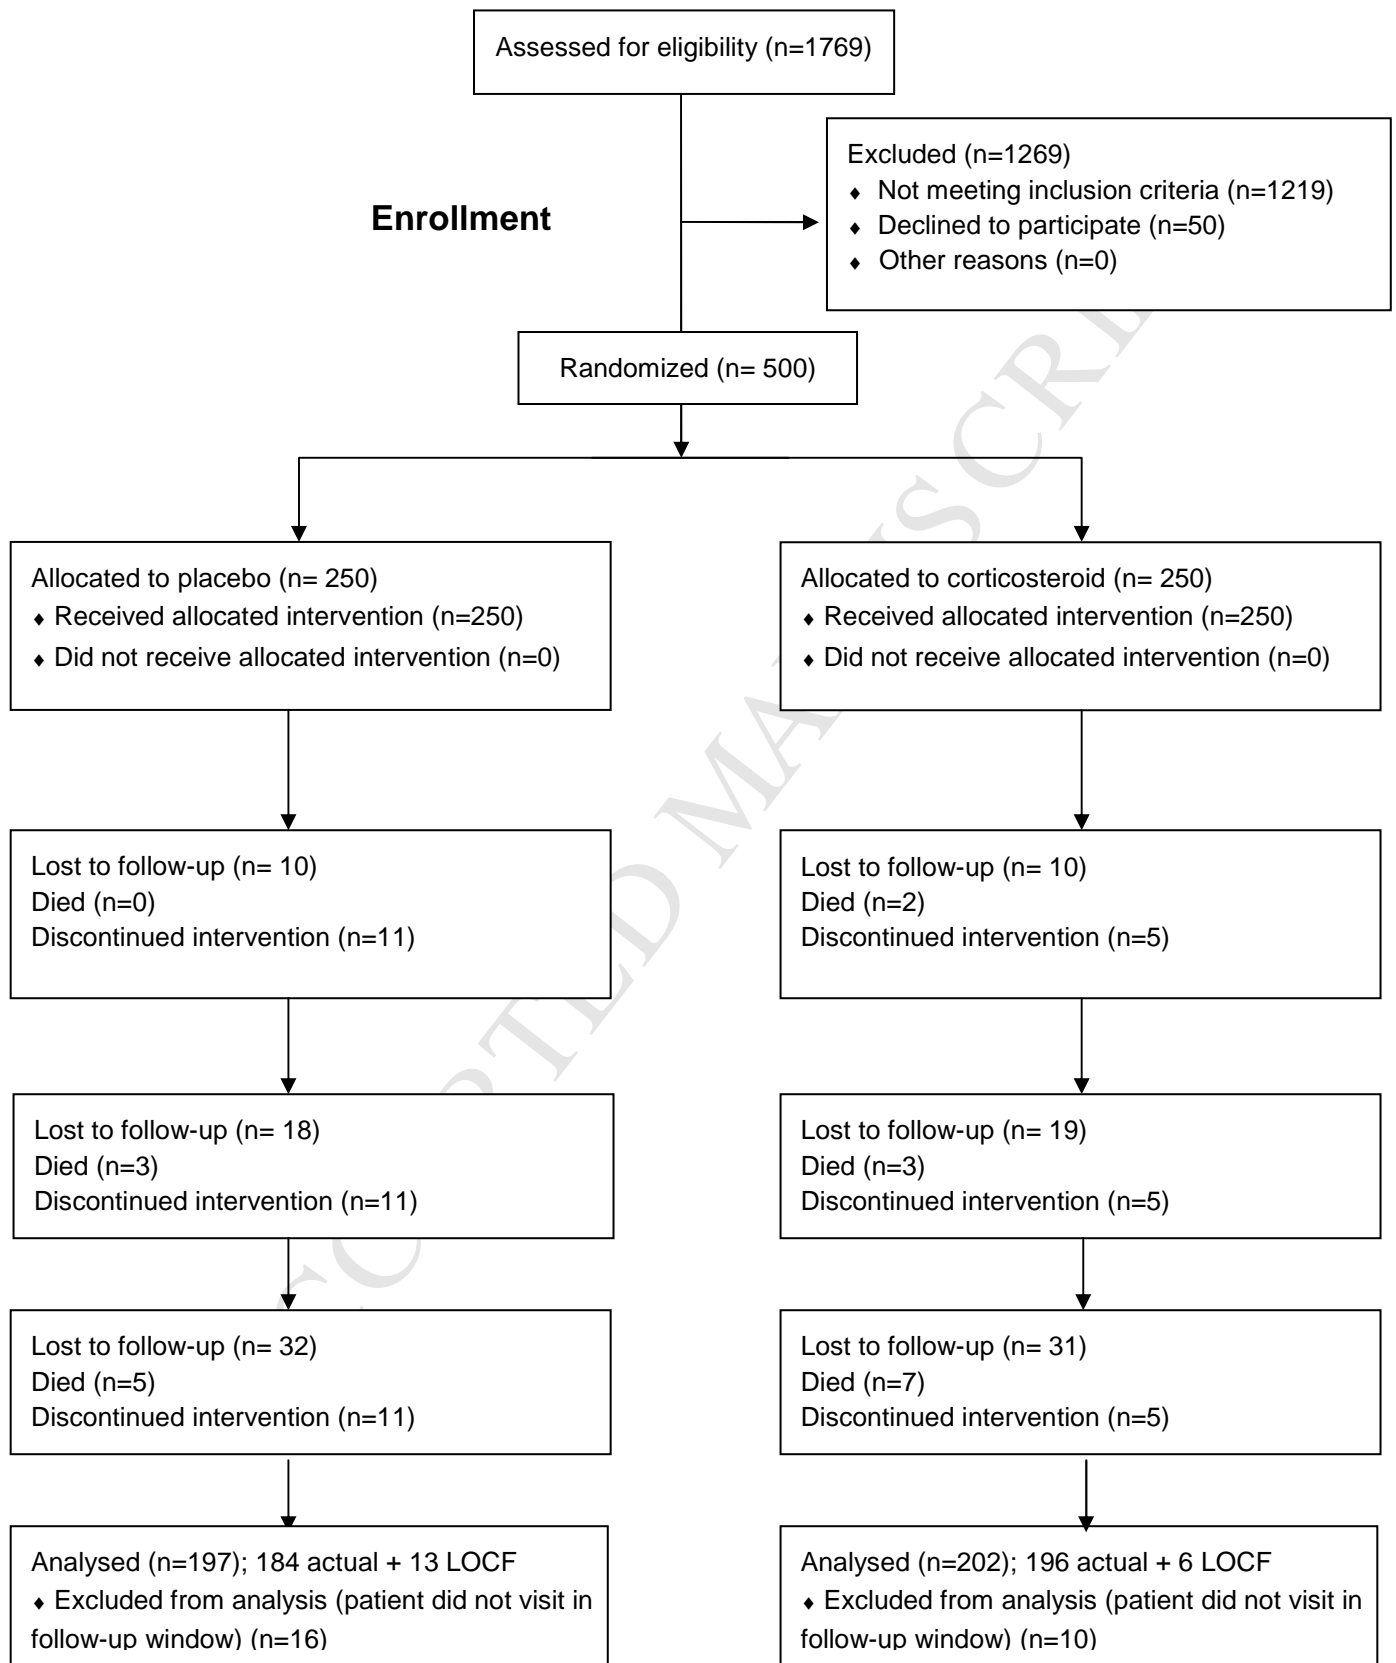

Supplement: NIHMS529478-supplement-supplement_1.pdf [file NIHMS529478-supplement-supplement_1.pdf]
